# Supplementary material for: Expression of functional toll like receptor 4 in estrogen receptor/progesterone receptor-negative breast cancer
Source: PubMed Central journal article supplement (PMC4578669; doi:10.1186/s13058-015-0640-x), 2015-09-22

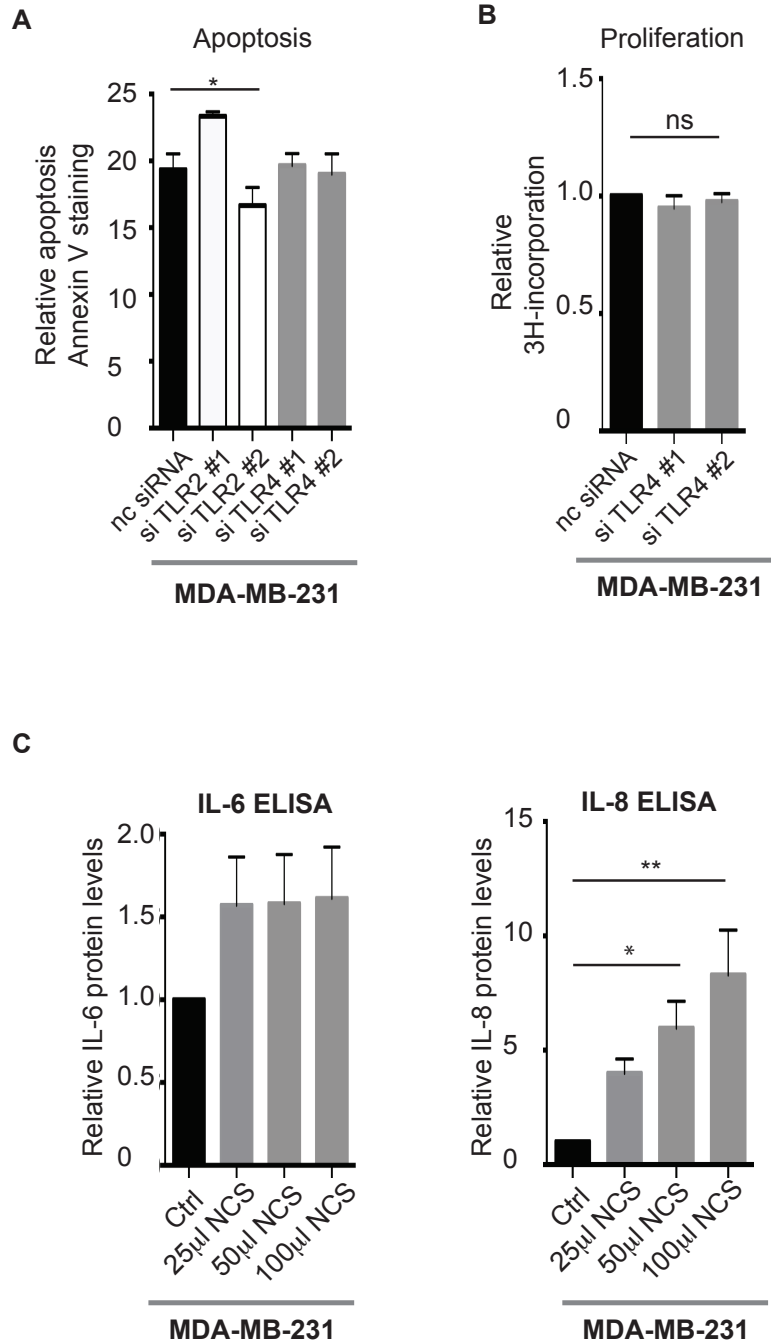

Supplement: 13058_2015_640_MOESM2_ESM.pdf [file 13058_2015_640_MOESM2_ESM.pdf]
