# Supplementary material for: Expression of functional toll like receptor 4 in estrogen receptor/progesterone receptor-negative breast cancer
Source: Springer Nature journal article supplement (doi:10.1186/s13058-015-0640-x), 2015-09-21
Supplement: MOESM1 [file 9781570]

## Additional file 1: Table S1

### Primer sequences

|                                                                           |
|---------------------------------------------------------------------------|
| <i>YWHAZ</i> (F: ACTTTTGGTACATTGTGGCTTCAA, R: CCGCCAGGACAAACCAGTAT)       |
| <i>UBC</i> (F: ATTTGGGTCGCGGTTCTTG, R: TGCCTTGACATTCTCGATGGT)             |
| <i>SDHA</i> (F: TGGGAACAAGAGGGCATCTG, R: CCACCACTGCATCAAATTCATG)          |
| <i>TLR2</i> (F: GCCTCTCCAAGGAAGAATCC, R: TCCTGTTGTTGGACAGGTCA)            |
| <i>TLR3</i> (F: TGGTTGGGCCACCTAGAAGTA, R: TCTCCATTCTGGCCTGTG)             |
| <i>TLR4</i> (F: AAGCCGAAAGGTGATTGTTG, R: CTGAGCAGGGTCTTCTCCAC)            |
| <i>TLR9</i> (F: CTGCCTTCTACCCTGTGAG, R: GGATGCGGTTGGAGGACAA)              |
| <i>MD2</i> (F: CCGATGCAAGTATTTTCATACACCTACT, R: CTCCTTGGAATGTAGAAAATGTGC) |
| <i>CD14</i> (F: GCCCTTACCAGCCTAGACCT, R: CCCGTC CAGTGT CAGGTTAT)          |
| <i>IL-6</i> (F: GGC ACTGGCAGAAAACAACC, R: GCAAGTCTCCTCATTGAATCC )         |
| <i>IL-8</i> (F: ACTGAGAGTGATTGAGAGTGGAC, R: AACCTCTGCACCCAGTTTTTC)        |
